# Supplementary material for: Contribution of NK cells to HBsAg seroconversion in inactive HBsAg carriers following pegylated IFN therapy
Source: PubMed Central journal article supplement — Innate Immun. 2020 Aug 9;26(7):601–8. doi: 10.1177/1753425920942580 (PMC7556194; doi:10.1177/1753425920942580), 2020-08-09
Supplement: sj-pdf-1-ini-10.1177_1753425920942580.pdf [file sj-pdf-1-ini-10.1177_1753425920942580.pdf]

**We performed multivariate regression analysis to identify factors associated with HBsAg seroconversion. The result showed baseline NK cell is related to response ( $P = 0.017$ ) after adjustment to other variables (baseline HBsAg, gender, age and ALT level).**

**Table 1.** Baseline NK cell is related to response ( $P = 0.005$ ).

| <b>HBsAg</b>          | <b>Odds Ratio</b> | <b>Std. Err.</b> | <b>z</b> | <b><math>P &gt;  z </math></b> | <b>[95% Conf. Interval]</b> |          |
|-----------------------|-------------------|------------------|----------|--------------------------------|-----------------------------|----------|
| <b>seroconversion</b> |                   |                  |          |                                |                             |          |
| NK at baseline        | 1.271193          | .1087321         | 2.81     | 0.005                          | 1.074988                    | 1.503209 |
| _cons                 | .0274497          | .030234          | -3.26    | 0.001                          | .0031695                    | .2377275 |

**Table 2.** Baseline NK cell is related to response ( $P = 0.017$ ) after adjustment to other variables (baseline HBsAg, Gender, Age and Alt level).

| <b>HBsAg</b>          | <b>Odds Ratio</b> | <b>Std. Err.</b> | <b>z</b> | <b><math>P &gt;  z </math></b> | <b>[95% Conf. Interval]</b> |          |
|-----------------------|-------------------|------------------|----------|--------------------------------|-----------------------------|----------|
| <b>seroconversion</b> |                   |                  |          |                                |                             |          |
| NK at baseline        | 1.32882           | .158491          | 2.38     | 0.017                          | 1.05182                     | 1.678767 |
| HBsAg                 | .9952006          | .0031636         | -1.51    | 0.130                          | .9890192                    | 1.001421 |
| Sex                   | .2639946          | .2800003         | -1.26    | 0.209                          | .0330207                    | 2.110591 |
| Age                   | 1.023463          | .0564205         | 0.42     | 0.674                          | .9186453                    | 1.14024  |
| ALT                   | .8776591          | .0767854         | -1.49    | 0.136                          | .7393588                    | 1.041829 |
| _cons                 | 1.0888            | 3.259941         | 0.03     | 0.977                          | .0030789                    | 385.0369 |
